# Supplementary material
Source: PubMed Central journal article supplement (PMC3070948)
Supplement: NIHMS160299-supplement-2.pdf [file NIHMS160299-supplement-2.pdf]

**Physical disruption of skin during poxvirus immunization is critical for the generation of highly protective T cell-mediated immunity.** Luzheng Liu, Qiong Zhong, Tian Tian, Krista Dubin, Shruti K. Athale, and Thomas S. Kupper

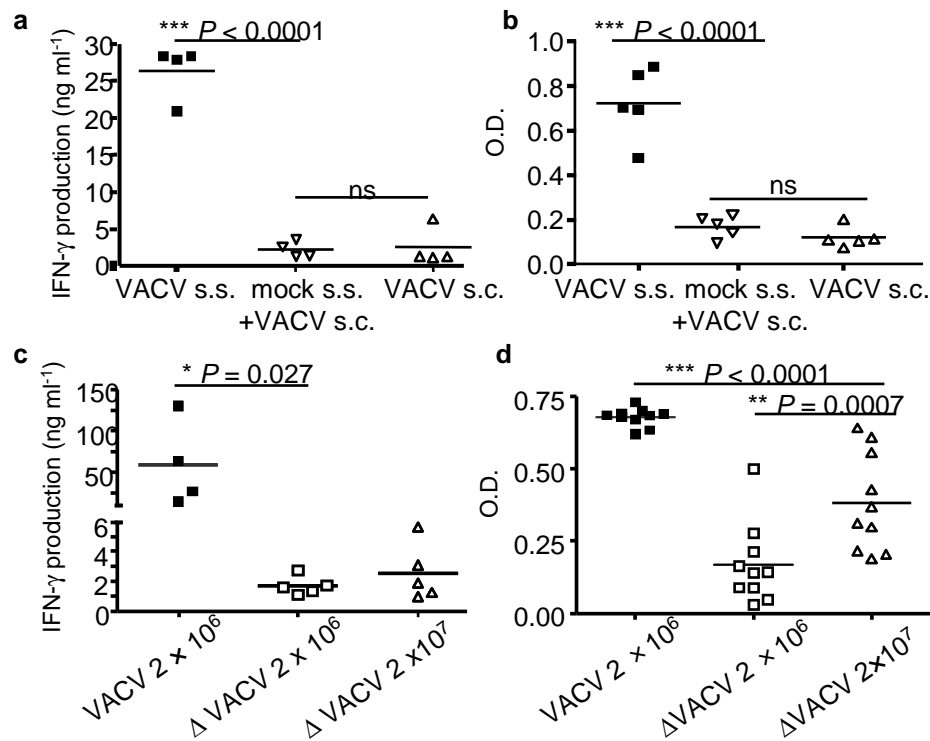

**Supplementary Figure 1 Inoculation of live VACV in the context of superficially injured skin is critical to the induction of robust immune responses.**

(a, b) Mice were immunized with VACV via s.s., or s.c. injection with or without concurrent mechanical epidermal disruption (mock s.s.). Primary T cell response was assessed on d 7 p.i. by the production of IFN- $\gamma$  from splenocytes using *in vitro* restimulation assay (a). Serum VACV-specific IgG was assessed 6 weeks p.i. (b). (c, d) Mice were immunized via s.s. with live or heat-inactivated ( $\Delta$ ) VACV at the indicated doses. Primary T cell response (c) and antibody response (d) were measured at 7 d and 6 weeks p.i., respectively. Data are representative results from 2–3 independent experiments.

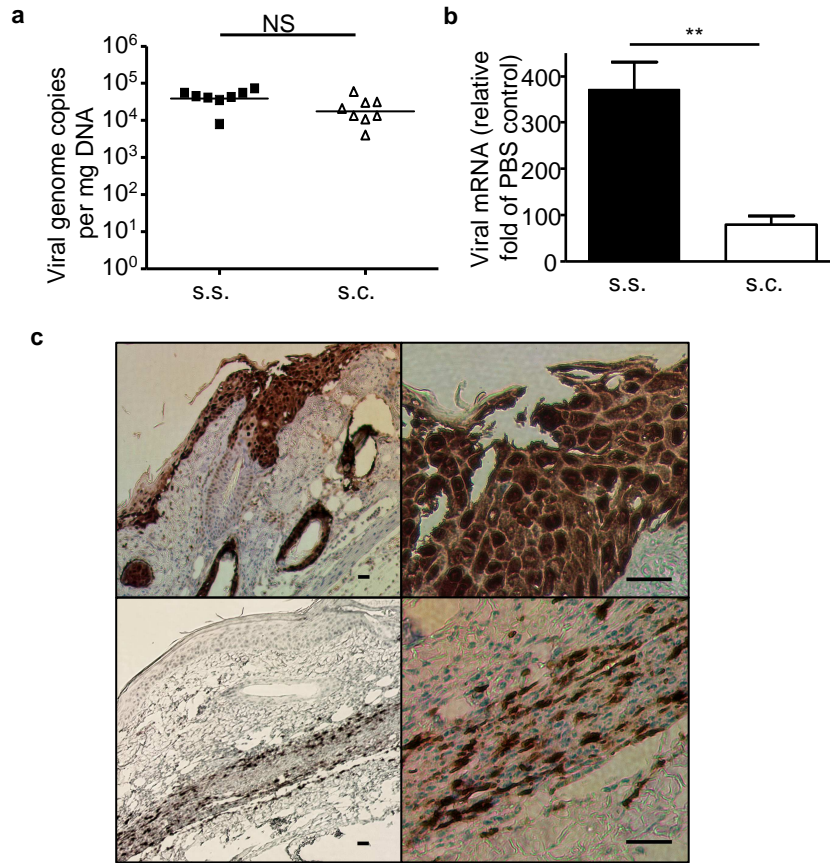

**Supplementary Figure 2 VACV delivery via disrupted epidermis led to significantly higher level of viral gene expression compared to s.c. injection.** C57BL/6 mice were immunized with  $2 \times 10^6$  pfu VACV (EGFP-expressing) via s.s. or s.c. route. (a) The initial viral load measured at 30 min p.i.. Data represent the means  $\pm$  SE of 8 individual mice in one experiment. (b) Early viral gene mRNA expression at the inoculation site measured by real-time RT-PCR at 8 h p.i.. Data represent the means  $\pm$  SE of 6 individual mice in one experiment. (c) VACV-infected cells at the inoculation site detected by IHC staining for EGFP at 3 d following immunization via s.s. route (upper panel), or s.c. route (lower panel). Scale bars represent 5  $\mu$ m.

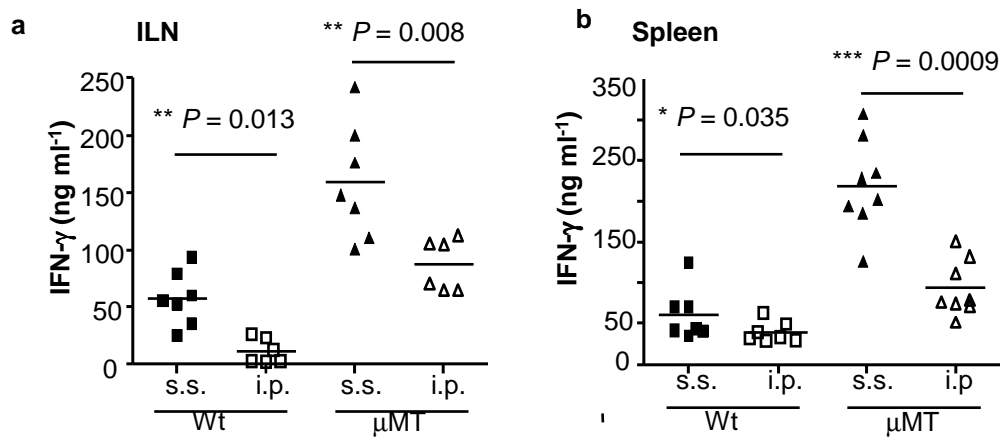

**Supplementary Figure 3 VACV immunization via s.s. route generated significantly more robust recall memory response than i.p. immunization upon secondary cutaneous poxvirus challenge.** C57BL/6 mice or  $\mu$ MT mice were immunized with  $2 \times 10^6$  pfu VACV via s.s. route or i.p. injection, and challenged with secondary cutaneous VACV infection at 6 weeks p.i.. Recall T cell response in ILN (**a**) and spleen (**b**) were assessed by *in vitro* restimulation assay.

**a** Before challenge (14 weeks p.i.)

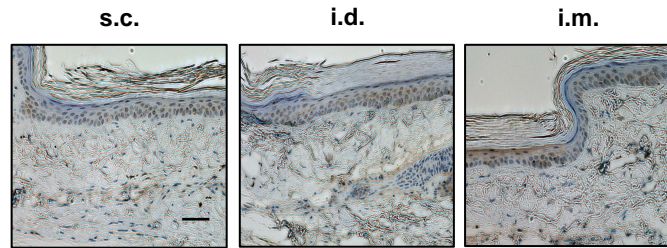

**b** 4 d after challenge

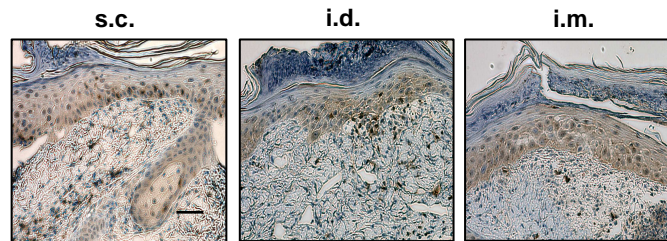

#### **Supplementary Figure 4. VACV immunization via s.c., i.d., and i.m injection**

**route failed to induce robust skin-infiltrating  $T_{EM}$ .** C57BL/6 mice were immunized with  $2 \times 10^6$  pfu VACV via the indicated injection routes and challenged cutaneously at 14 weeks post immunization. The presence of  $T_{EM}$  in skin before (**a**) and after (**b**) challenge was detected microscopically by IHC staining for  $CD3^+$  cells. Photographs shown are the representative of 9 slides from 3 mice per group. Scale bar represents 5  $\mu\text{m}$ .

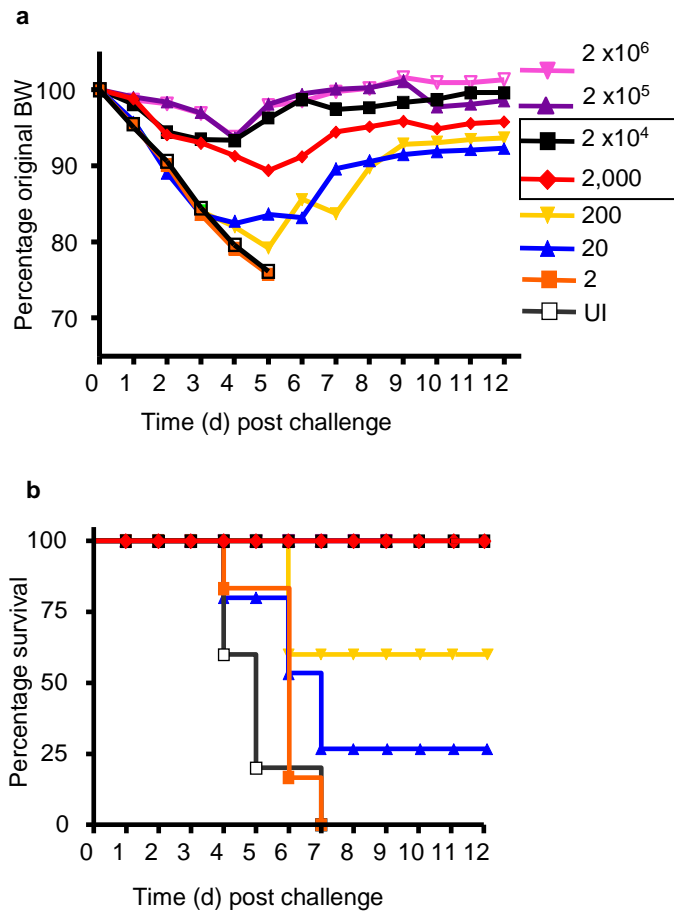

**Supplementary Figure 5 Single-dose VACV immunization via s.s. route is highly efficacious to protect mice from lethal intranasal WR-VACV challenge.** C57BL/6 mice were immunized with titrated doses of VACV via s.s. route and lethally challenged with WR-VACV intranasal infection at 6 weeks p.i.. Loss of BW (**a**) and survival (**b**) were monitored daily.  $n=5$  in each group. Data is representative of two independent experiments.

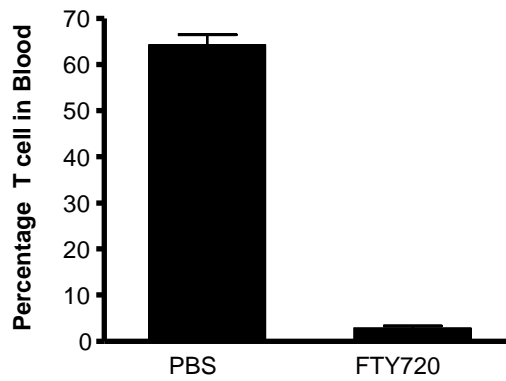

**Supplementary Figure 6**     **FTY720 treatment led to blockage of lymphocyte egress from lymphoid tissues and development of lymphocytopenia.**  $\mu$ MT mice were immunized with  $2 \times 10^6$  pfu VACV via s.s. route and challenged intranasally with lethal dose WR-VACV at 16 weeks post immunization. Mice were treated daily with FTY720 or PBS (mock) starting from 2 d before the challenge. Percentage of T cells in peripheral blood was determined 2 h prior to the challenge to assess the blockage of T cell egress from lymphoid tissues.  $n = 10$  in each group. Data is representative of 2 independent experiments.

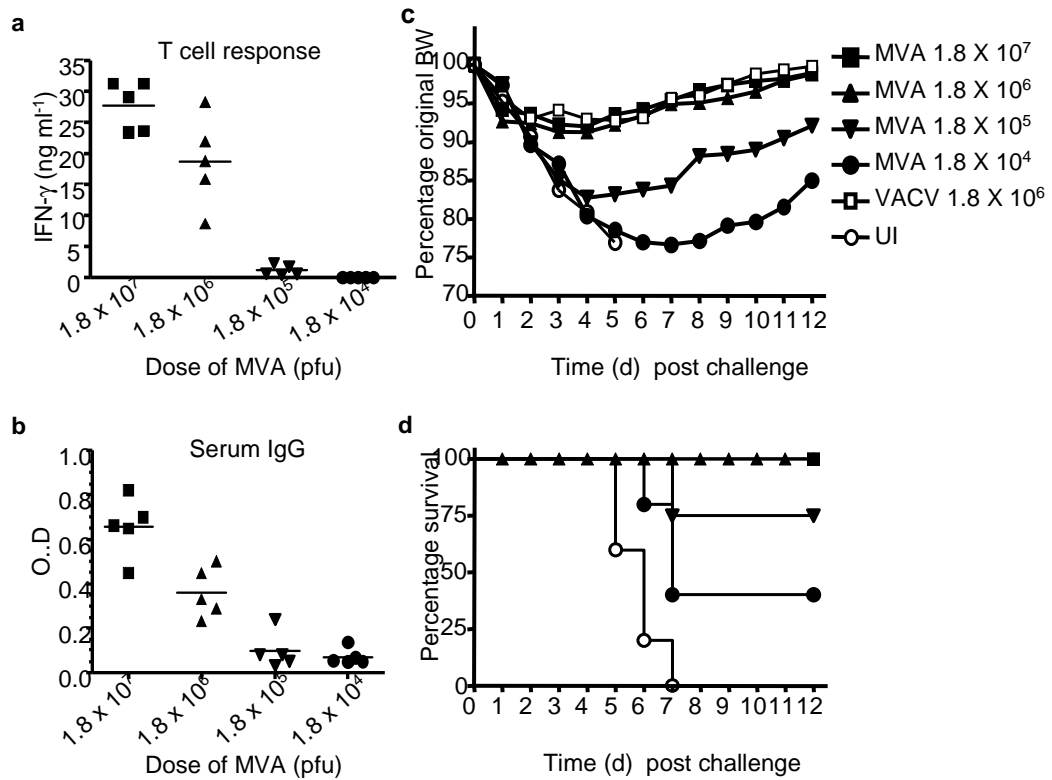

**Supplementary Figure 7 MVA immunization via s.s. route demonstrated dose-dependent immunogenicity and protection efficacy.** C57BL/6 mice were immunized via s.s. route with the indicated doses of MVA. **(a)** Primary VACV-specific T cell response was measured in ILN at day 7 p.i. by *in vitro* re-stimulation assay. **(b)** Serum vaccinia-specific IgG was measured at 6 weeks p.i. by ELISA. **(c,d)** Immunized mice were challenged with lethal dose of intranasal WR-VACV infection. BW **(c)** and survival **(d)** were monitored daily. VACV scarified memory mice were included as controls.  $n = 5$  in each group. Data is representative of two independent experiments.

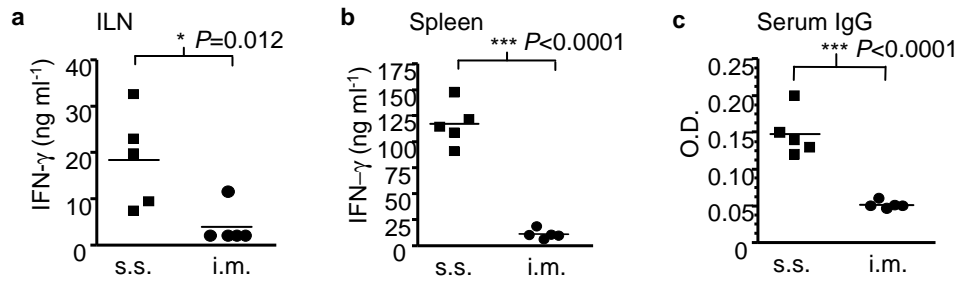

**Supplementary Figure 8 MVA immunization via s.s. route elicited stronger cellular and humoral immune response compared to the i.m. routes.** C57BL/6 mice were immunized with  $2 \times 10^6$  pfu MVA by the indicated routes. Primary T cell response was measured in spleen (a) and ILN (b) on day 7 p.i.. Serum VACV-specific IgG level was measured by ELISA 6weeks p.i. (c).  $n = 5$  in each group. Data represent three independent experiments.



## **SUPPLEMENTARY METHODS:**

**Real-time RT-PCR to detect vaccinia mRNA expression.** C57BL/6 mice were immunized with  $2 \times 10^6$  pfu VACV at ~ 1 cm from the base of the tails via either s.s. or s.c.. Tail segments (1 cm long) were cut from the inoculation sites 8 h following immunization and immediately snap-frozen in liquid nitrogen. RNA extract and real-time RT-PCR were performed as previously described with minor modification<sup>1</sup>. The primers are specific for the ribonucleotide reductase Vv14L of VACV. The sequences are: (forward) 5'-GAC ACT CTG GCA GCC GAA AT-3'; (reverse) 5'-CTG GCG GCT AGA ATG GCA TA-3'; Thermocycle conditions were 1 cycle of 95 °C for 2 min, followed by 45 cycles of amplification (95 °C for 15 s, 60 °C for 15 s, and 72 °C for 45 s), 1 cycle of 95 °C for 60 s, 1 cycle of 55 °C for 60 s, and 80 cycles of 55 °C for 10 s. The level of viral gene expression was normalized to that in the skin samples of mock (PBS)-immunized mice.

**Detection of virus-encoded EGFP expression by IHC.** Tail samples were harvested from the inoculation site 3 d after mice received  $2 \times 10^6$  pfu VACV via s.s. or s.c. route. Tissues were preserved in 10% formalin, embedded in paraffin, sectioned (5µM) and stained with anti-EGFP at Brigham and Women's Hospital Histopathology Core as described previously with minor modification<sup>1</sup>: Briefly, slides were deparaffinized and pre-treated with 1mM EDTA, pH 8.0 (Zymed, South San Francisco, CA) in a steam pressure cooker (Decloaking Chamber, BioCare Medical, Walnut Creek, CA) as per manufacturer's instructions followed by washing in distilled water. All further steps were performed at room temperature in a hydrated chamber. Slides were pre-treated with

Peroxidase Block (DAKO USA, Carpinteria, CA) for 5 minutes to quench endogenous peroxidase activity, followed by a 1:5 dilution of goat serum in 50 mM Tris-Cl, pH 7.4, for 20 minutes to block non-specific binding sites. Primary murine anti-GFP antibody (Clone JL-8; Clontech, Palo Alto, CA) was applied at a 1:1000 dilution in DAKO diluent.. After washing in 50 mM Tris-Cl, 0.05% Tween 20, pH 7.4, anti-mouse horseradish peroxidase-conjugated antibody (Envision detection kit, DAKO) was applied for 30 min. Immunoperoxidase staining was developed using a diaminobenzidine (DAB)+ chromogen kit (DAKO) per the manufacturer and counterstained with hematoxylin.

## **Reference**

1. Liu, L., Fuhlbrigge, R.C., Karibian, K., Tian, T. & Kupper, T.S. Dynamic programming of CD8+ T cell trafficking after live viral immunization. *Immunity* 25, 511-520 (2006).
